# Supplementary material
Source: Springer Nature journal article supplement (https://www.springermedizin.de/resource/supplementary/13756_2012_15_MOESM1_ESM.pdf/9682224)
Supplement: MOESM1 [file 9682224]

330 articles initially retrieved

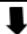

Review <sup>1</sup>

304 articles excluded, 26 articles remained

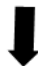

Review <sup>2</sup>

10 articles excluded, 16 articles remained

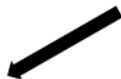

2 prospective

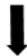

12 retrospective

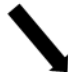

2 review
